# Supplementary figures and images for: Mercurophilic interaction in novel polynuclear Hg(ii)–2-aminoethanethiolates
Source: Royal Society of Chemistry journal article supplement (doi:10.1039/b509699e), 2005-01-01

O(2W)

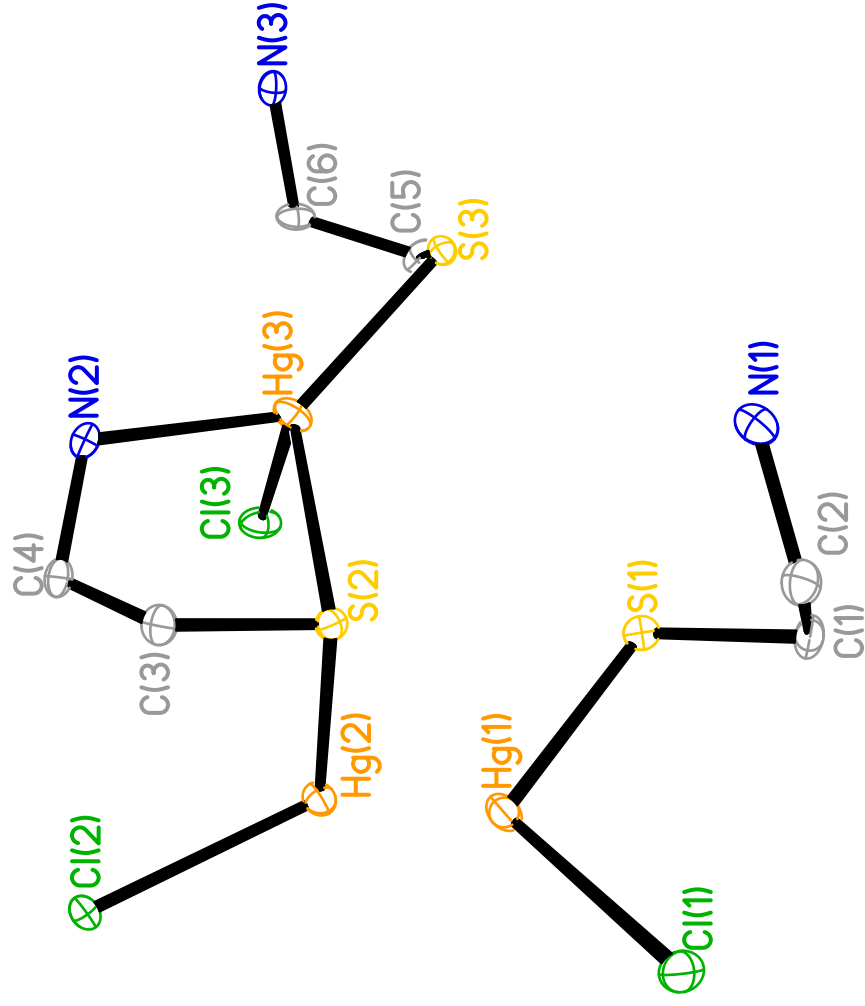

O(1W)

Supplement: b509699e.pdf [file b509699e.pdf]
